# Supplementary material
Source: PubMed Central journal article supplement (PMC2783275)
Supplement: NIHMS151368-supplement-01.pdf [file NIHMS151368-supplement-01.pdf]

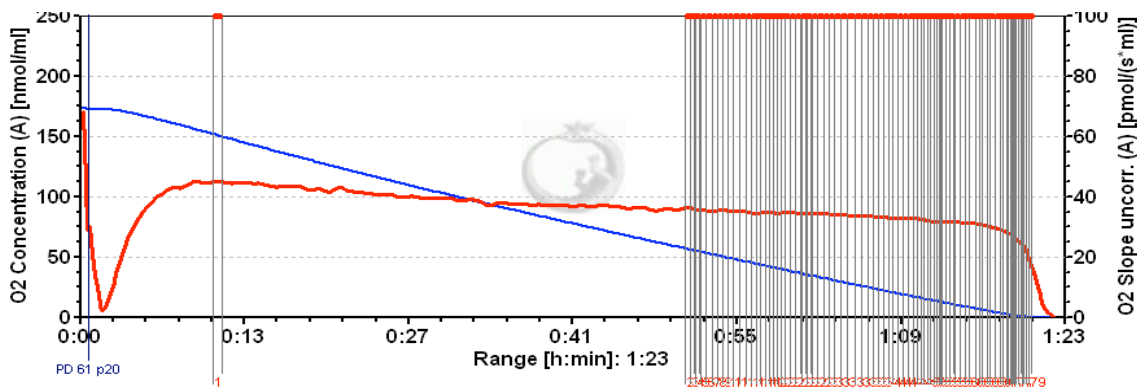

**[oxygen] respiration [oxygen] respiration**

|         |         |         |         |
|---------|---------|---------|---------|
| 56.6541 | 36.3662 | 20.3572 | 32.7808 |
| 55.7643 | 36.1209 | 19.5355 | 32.803  |
| 54.876  | 35.6828 | 18.6435 | 32.8938 |
| 53.8812 | 35.5395 | 17.7241 | 32.9458 |
| 52.8697 | 35.3428 | 16.9784 | 32.8351 |
| 51.7249 | 35.2277 | 16.3912 | 32.6522 |
| 50.7336 | 35.5755 | 15.818  | 32.4544 |
| 49.7742 | 35.5793 | 15.3134 | 32.2155 |
| 48.8639 | 35.343  | 14.8314 | 32.0295 |
| 47.8435 | 35.1594 | 14.2923 | 31.8429 |
| 46.7584 | 35.1134 | 13.7765 | 31.8185 |
| 45.757  | 34.9094 | 13.3302 | 31.9341 |
| 44.8867 | 34.6621 | 12.9505 | 31.9688 |
| 44.0541 | 34.645  | 12.4112 | 31.8879 |
| 43.1808 | 34.8119 | 11.7449 | 31.7873 |
| 42.3842 | 34.8042 | 11.0489 | 31.7162 |
| 41.7258 | 34.7655 | 10.1654 | 31.6505 |
| 41.1044 | 34.6456 | 9.3537  | 31.4685 |
| 40.4048 | 34.6592 | 8.6349  | 31.3213 |
| 39.6332 | 34.8137 | 7.8246  | 31.2269 |
| 38.8668 | 34.9633 | 7.0833  | 31.1298 |
| 37.9333 | 34.8251 | 6.5056  | 30.9436 |
| 36.9304 | 34.6334 | 5.9359  | 30.6172 |
| 36.0004 | 34.5609 | 5.3405  | 30.2476 |
| 35.0719 | 34.4549 | 4.6962  | 29.8218 |
| 34.1128 | 34.3375 | 3.9716  | 29.3912 |
| 33.0443 | 34.3795 | 3.4042  | 29.0205 |
| 32.1211 | 34.3844 | 2.9622  | 28.6625 |
| 31.1356 | 34.1502 | 2.6155  | 28.2796 |
| 30.111  | 34.0427 | 2.3762  | 27.9167 |
| 28.9938 | 34.062  | 2.1194  | 27.4689 |
| 27.8147 | 33.7658 | 1.8426  | 26.9442 |
| 26.5349 | 33.7014 | 1.568   | 26.406  |
| 25.4238 | 33.6864 | 1.2915  | 25.7292 |
| 24.4558 | 33.5817 | 1.0004  | 24.9231 |
| 23.554  | 33.4235 | 0.7457  | 23.8431 |
| 22.719  | 33.4144 | 0.5456  | 22.6749 |
| 21.8967 | 33.2662 | 0.3723  | 21.3071 |
| 21.1117 | 32.994  | 0.2347  | 19.3316 |

One site binding (hyperbola)

Best-fit values

BMAX 35.21

KD 0.8098

Std. Error

BMAX 0.2576

KD 0.08272

95% Confidence Intervals

BMAX 34.70 to

35.72

KD 0.6446 to

0.9750

Goodness of Fit

Degrees of Freedom 68

R squared 0.665
