# Supplementary material
Source: PubMed Central journal article supplement (PMC2783275)
Supplement: NIHMS151368-supplement-1.pdf [file NIHMS151368-supplement-1.pdf]

Figure 9. Correlations among complex I-driven state 3 respiration in gradient-purified mitochondria of sPD cybrids and their copy number content of mtDNA genes and D-loop assayed by qPCR.

Supplemental Figure 1. Normoxic-anoxic transition experiment example. Shown is a respiratory tracing from a sPD cybrid cell line that is allowed to deplete chamber oxygen levels (blue line) to ~zero. Vertical black lines represent individual data points collected that are shown. Curve fitting was carried out in GraphPad Prism using single site Michaelis-Menten rectangular hyperbolic curve fitting.
